# Supplementary material for: Cost and cost effectiveness of reactive case detection (RACD), reactive focal mass drug administration (rfMDA) and reactive focal vector control (RAVC) to reduce malaria in the low endemic setting of Namibia: an analysis alongside a 2×2 factorial design cluster randomised controlled trial
Source: HighWire-hosted journal article supplement (doi:10.1136/bmjopen-2021-049050), 2022-06-01
Supplement: bmjopen-2021-049050supp001_data_supplement.pdf [file bmjopen-2021-049050supp001_data_supplement.pdf]

**Supplement to:**

**Cost and cost-effectiveness of reactive case detection (RACD), reactive focal mass drug administration (rfMDA), and reactive focal vector control (RAVC) to reduce malaria in the low endemic setting of Namibia: an analysis alongside a 2x2 factorial design cluster randomized controlled trial**

**Table of Contents**

|                                                                             |          |
|-----------------------------------------------------------------------------|----------|
| <b>Appendix 1a. Cumulative incidence of locally acquired malaria .....</b>  | <b>2</b> |
| <b>Appendix 1b. Prevalence of quantitative PCR-detected infection .....</b> | <b>3</b> |
| <b>Appendix 2. Comparison groups .....</b>                                  | <b>4</b> |
| <b>Appendix 3. Namibia Government salary scale .....</b>                    | <b>5</b> |

**Appendix 1a. Cumulative incidence of locally acquired malaria**

|                                     | No. of EAs | Incidence per 1000 person-years (95% CI) | p value | Incidence rate ratio (95% CI) | p value | Adjusted incidence rate ratio (95% CI) | p value |
|-------------------------------------|------------|------------------------------------------|---------|-------------------------------|---------|----------------------------------------|---------|
| <b>Human reservoir</b>              |            |                                          |         |                               |         |                                        |         |
| RACD                                | 27         | 38.3 (23.0–53.6)                         | 0.26    | 1 (reference)                 | 0.51    | 1 (reference)                          | 0.009   |
| rfMDA                               | 28         | 30.8 (12.8–48.7)                         |         | 0.82 (0.26–1.37)              |         | 0.52 (0.16–0.88)                       |         |
| <b>Mosquito reservoir</b>           |            |                                          |         |                               |         |                                        |         |
| No RAVC                             | 27         | 38.9 (20.7–57.1)                         | 0.23    | 1 (reference)                 | 0.41    | 1 (reference)                          | 0.002   |
| RAVC                                | 28         | 30.2 (15.0–45.5)                         |         | 0.78 (0.26–1.30)              |         | 0.48 (0.16–0.80)                       |         |
| <b>Mosquito and human reservoir</b> |            |                                          |         |                               |         |                                        |         |
| RACD only                           | 13         | 41.4 (21.5–61.2)                         | 0.11    | 1 (reference)                 | 0.32    | 1 (reference)                          | 0.006   |
| rfMDA+RAVC                          | 14         | 25.0 (5.2–44.7)                          |         | 0.62 (0.24–1.59)              |         | 0.26 (0.10–0.68)                       |         |

RACD: reactive case detection, rfMDA: reactive focal mass drug administration, RAVC: reactive vector control

**Appendix 1b. Prevalence of quantitative PCR-detected infection**

|                                     | N    | Prevalence<br>(95% CI) | p<br>value | Prevalence ratio<br>(95% CI) | p<br>value | Adjusted<br>prevalence ratio<br>(95% CI) | p value |
|-------------------------------------|------|------------------------|------------|------------------------------|------------|------------------------------------------|---------|
| <b>Human reservoir</b>              |      |                        |            |                              |            |                                          |         |
| RACD                                | 2150 | 3.78% (2.85-5.00)      | 0.46       | 1 (reference)                | 0.92       | 1 (reference)                            | 0.009   |
| rfMDA                               | 1932 | 3.16% (2.14-4.65)      |            | 1.05 (0.03-2.07)             |            | 0.59 (0.21-0.98)                         |         |
| <b>Mosquito reservoir</b>           |      |                        |            |                              |            |                                          |         |
| No RAVC                             | 2030 | 4.07% (2.92-5.64)      | 0.15       | 1 (reference)                | 0.13       | 1 (reference)                            | 0.002   |
| RAVC                                | 2052 | 2.92% (2.13-3.99)      |            | 0.61 (0.10-1.12)             |            | 0.36 (0.13-0.59)                         |         |
| <b>Human and mosquito reservoir</b> |      |                        |            |                              |            |                                          |         |
| RACD only                           | 1016 | 3.70% (2.39-5.69)      | 0.04       | 1 (reference)                | 0.17       | 1 (reference)                            | 0.004   |
| rfMDA+RAVC                          | 918  | 1.75% (0.99-3.09)      |            | 0.52 (0.20-1.32)             |            | 0.16 (0.05-0.55)                         |         |

RACD: reactive case detection, rfMDA: reactive focal mass drug administration, RAVC: reactive vector control

## Appendix 2. Comparison groups

|                                                     |                       |                                  |                                         |                                |
|-----------------------------------------------------|-----------------------|----------------------------------|-----------------------------------------|--------------------------------|
| <b>rfMDA<br/>versus<br/>RACD</b>                    |                       |                                  | Human reservoir                         |                                |
|                                                     |                       |                                  | <b>RACD<br/>(28 clusters)</b>           | <b>rfMDA<br/>(28 clusters)</b> |
|                                                     | Mosquito<br>reservoir | <b>No RAVC</b>                   | RACD only                               | rfMDA only                     |
| <b>RAVC</b>                                         |                       | RACD +<br>RAVC                   | rfMDA +<br>RAVC                         |                                |
| <b>RAVC<br/>versus<br/>No<br/>RAVC</b>              |                       |                                  | Human reservoir                         |                                |
|                                                     |                       |                                  | <b>RACD</b>                             | <b>rfMDA</b>                   |
|                                                     | Mosquito<br>reservoir | <b>No RAVC<br/>(28 clusters)</b> | RACD only                               | rfMDA only                     |
| <b>RAVC<br/>(28 clusters)</b>                       |                       | RACD +<br>RAVC                   | rfMDA +<br>RAVC                         |                                |
| <b>rfMDA<br/>+RAVC<br/>versus<br/>RACD<br/>only</b> |                       |                                  | Human reservoir                         |                                |
|                                                     |                       |                                  | <b>RACD</b>                             | <b>rfMDA</b>                   |
|                                                     | Mosquito<br>reservoir | <b>No RAVC</b>                   | RACD only<br><b>(14 clusters)</b>       | rfMDA only                     |
| <b>RAVC</b>                                         |                       | RACD +<br>RAVC                   | rfMDA +<br>RAVC<br><b>(14 clusters)</b> |                                |

RACD: Reactive case detection, RAVC: Reactive vector control  
rfMDA: Reactive focal Mass Drug administration

**Appendix 3. Namibia Government salary scale**

| <b>Grade</b> | <b>Low per annum</b> |         | <b>High per annum</b> |         |
|--------------|----------------------|---------|-----------------------|---------|
| 15           | NAD                  | 35,777  | NAD                   | 46,521  |
| 14           | NAD                  | 54,682  | NAD                   | 71,105  |
| 13           | NAD                  | 72,556  | NAD                   | 94,349  |
| 12           | NAD                  | 99,633  | NAD                   | 119,501 |
| 11           | NAD                  | 122,965 | NAD                   | 147,485 |
| 10           | NAD                  | 147,485 | NAD                   | 176,895 |
| 9            | NAD                  | 180,505 | NAD                   | 216,499 |
| 8            | NAD                  | 220,828 | NAD                   | 263,911 |
| 7            | NAD                  | 269,189 | NAD                   | 321,707 |
| 6            | NAD                  | 328,139 | NAD                   | 392,158 |
| 5            | NAD                  | 400,001 | NAD                   | 478,220 |
| 4            | NAD                  | 478,220 | NAD                   | 502,753 |
| 3            | NAD                  | 512,809 | NAD                   | 544,196 |
| 2            | NAD                  | 555,080 | NAD                   | 589,055 |
| 1            | NAD                  | 600,837 | NAD                   | 637,612 |
| 1C           | NAD                  | 625,110 | NAD                   | 663,373 |
| 1B           | NAD                  | 650,365 | NAD                   | 690,172 |
| 1A           | NAD                  | 663,373 | NAD                   | 703,975 |
